# Supplementary material for: Long-Term Quality of Life after COVID-19 Infection: Cross-Sectional Study of Health Care Workers
Source: MDPI journal article supplement (doi:10.3390/ijerph21020235), 2024-02-17
Supplement: s1 [file s1]

## Symptoms and complaints

### Employees who have had a COVID-19 infection

| Persistent symptoms after COVID-19 infection |                            | Frequency | per cent |
|----------------------------------------------|----------------------------|-----------|----------|
| Valid                                        | Yes                        | 323       | 49.6     |
|                                              | No                         | 186       | 28.6     |
|                                              | Total                      | 509       | 78.2     |
| Missing                                      | without COVID-19 Infection | 142       | 21.8     |
| Total                                        |                            | 651       | 100      |

Figure S1 Persistent symptoms after COVID-19 infection Frequency per cent

In 63.45% of the 509 employees (n = 323), symptoms persisted after a COVID-19 infection. Of these people, 71.82% (n = 232) were female, 27.55% (n = 89) were male and 0.61% (n = 2) were of mixed gender.

The following symptoms of the 323 employees affected were revealed in terms of number and percentage distribution. The three most common symptoms are highlighted in dark:

| Persistent symptoms after a COVID-19 infection                              | Frequency / per cent |
|-----------------------------------------------------------------------------|----------------------|
| Increased tiredness, fatigue and weakness                                   | <b>219 / 67,80</b>   |
| Problems with climbing stairs and muscular strain                           | <b>170 / 52,63</b>   |
| Problems breathing or the feeling of breathlessness on exertion             | <b>142 / 43,96</b>   |
| Loss of the ability to concentrate                                          | 135 / 41,79          |
| Headache                                                                    | 112 / 34,67          |
| persistent cough                                                            | 94 / 29,10           |
| Joint or muscle pain                                                        | 92 / 28,48           |
| Feeling of palpitations                                                     | 87 / 26,93           |
| Impaired ability to concentrate and difficulty formulating longer sentences | 81 / 25,07           |

|                                                                    |            |
|--------------------------------------------------------------------|------------|
| Word-finding disorder                                              | 80 / 24,76 |
| Lack of drive and interest                                         | 78 / 24,14 |
| Irritability                                                       | 63 / 19,5  |
| Problems with smelling or tasting                                  | 58 / 17,95 |
| Anxiety and sleep disorders                                        | 47 / 14,55 |
| Problems with balance and fine motor skills                        | 42 / 13,00 |
| Problems controlling feelings                                      | 35 / 10,83 |
| Constipation or diarrhea                                           | 29 / 8,97  |
| Loss of appetite                                                   | 25 / 7,73  |
| Ongoing preoccupation with experiences during the Covid-19 disease | 22 / 6,81  |
| Nausea and vomiting                                                | 9 / 2,78   |

Table S1 Frequency of symptoms following a COVID-19 infection
